# Supplementary material for: Associations Between Procrastination and Subsequent Health Outcomes Among University Students in Sweden
Source: PubMed Central journal article supplement (PMC9857662; doi:10.1001/jamanetworkopen.2022.49346), 2023-01-04
Supplement: jamanetwopen-e2249346-s002.pdf [file jamanetwopen-e2249346-s002.pdf]

## Data Sharing Statement

Johansson. Associations Between Procrastination and Subsequent Health Outcomes Among University Students in Sweden. *JAMA Netw Open*. Published January 04, 2023.  
doi:10.1001/jamanetworkopen.2022.49346

### Data

**Data available:** No

### Additional Information

**Explanation for why data not available:** The dataset analysed in the current study is not publicly available due to secondary confidentiality and privacy of the participants.
